# Supplementary material for: Carboplatin/paclitaxel, E7-vaccination and intravaginal CpG as tri-therapy towards efficient regression of genital HPV16 tumors
Source: PubMed Central journal article supplement (PMC6503370; doi:10.1186/s40425-019-0593-1), 2019-05-06
Supplement: 40425_2019_593_MOESM1_ESM.pdf [file 40425_2019_593_MOESM1_ESM.pdf]

# Additional File 1

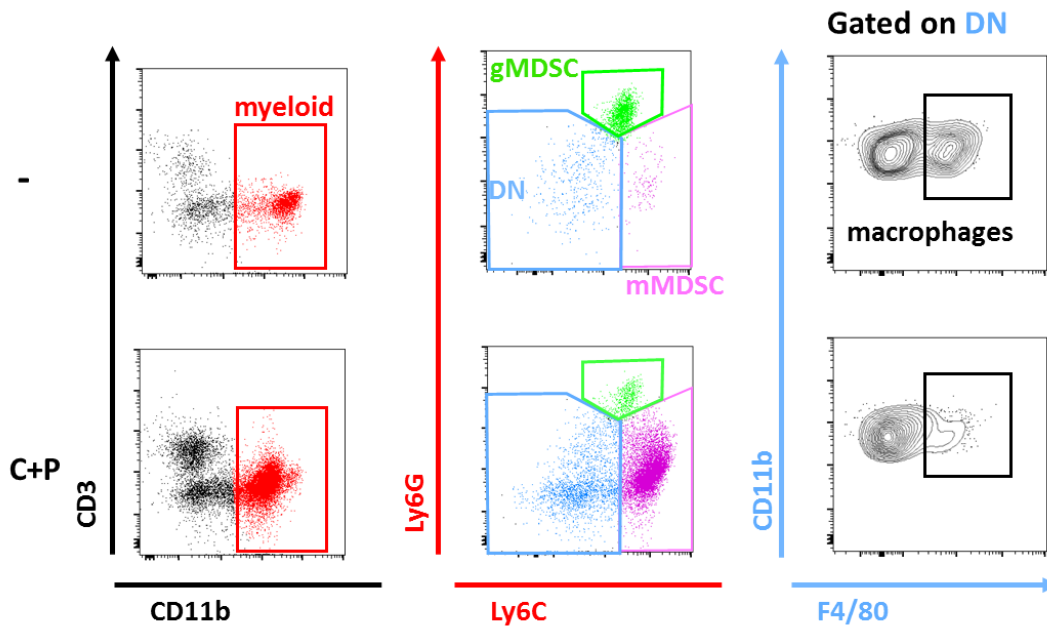

**Additional File 1. Effect of C+P on myeloid cell infiltration.** Gating strategy and representative flow cytometry plots showing myeloid (CD11b<sup>+</sup>), gMDSC (CD11b<sup>+</sup>Ly6G<sup>+</sup>), mMDSC (CD11b<sup>+</sup>Ly6C<sup>+</sup>), double negative (DN : CD11b<sup>+</sup>Ly6G<sup>neg</sup>Ly6C<sup>neg</sup>) and macrophage (CD11b<sup>+</sup>Ly6G<sup>neg</sup>Ly6C<sup>neg</sup>F4/80<sup>+</sup>) cell infiltration of TC-1 genital tumors at day 13 after C+P treatment or left untreated.
