# Supplementary material for: Carboplatin/paclitaxel, E7-vaccination and intravaginal CpG as tri-therapy towards efficient regression of genital HPV16 tumors
Source: PubMed Central journal article supplement (PMC6503370; doi:10.1186/s40425-019-0593-1), 2019-05-06
Supplement: 40425_2019_593_MOESM2_ESM.pdf [file 40425_2019_593_MOESM2_ESM.pdf]

## Additional File 2

A

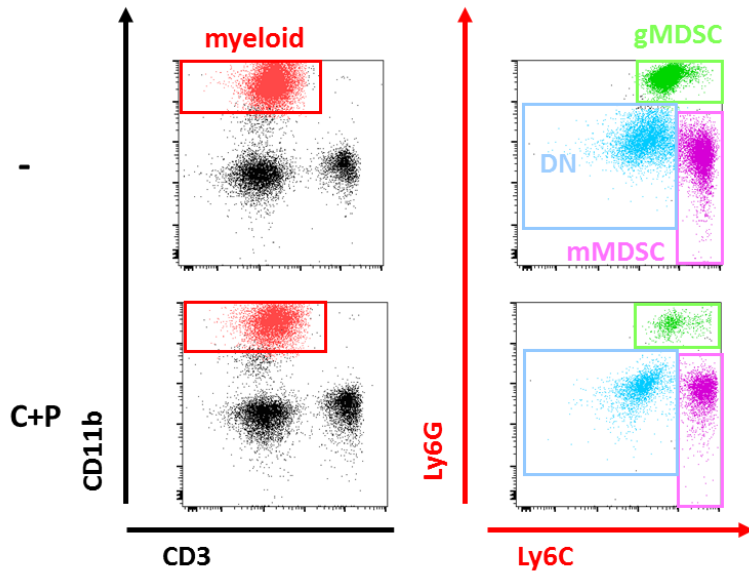

B

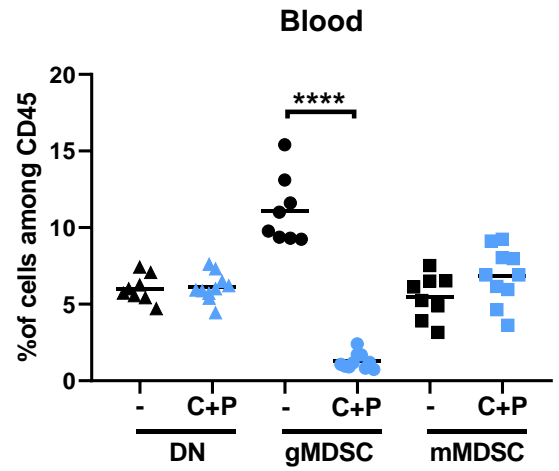

**Additional File 2. Effect of C+P on circulating myeloid cells.** A: Gating strategy and representative flow cytometry plots showing myeloid (CD11b<sup>+</sup>), gMDSC (CD11b<sup>+</sup>Ly6G<sup>+</sup>), mMDSC (CD11b<sup>+</sup>Ly6C<sup>+</sup>) and double negative (DN, CD11b<sup>+</sup>Ly6G<sup>neg</sup>Ly6C<sup>neg</sup>) cells in whole blood of mice bearing day 13 TC-1 genital tumors after C+P treatment or left untreated. B mean and individual percentages of the indicated myeloid cell subtypes among CD45<sup>+</sup> cells.
