# Supplementary material for: Carboplatin/paclitaxel, E7-vaccination and intravaginal CpG as tri-therapy towards efficient regression of genital HPV16 tumors
Source: PubMed Central journal article supplement (PMC6503370; doi:10.1186/s40425-019-0593-1), 2019-05-06
Supplement: 40425_2019_593_MOESM3_ESM.pdf [file 40425_2019_593_MOESM3_ESM.pdf]

## Additional File 3

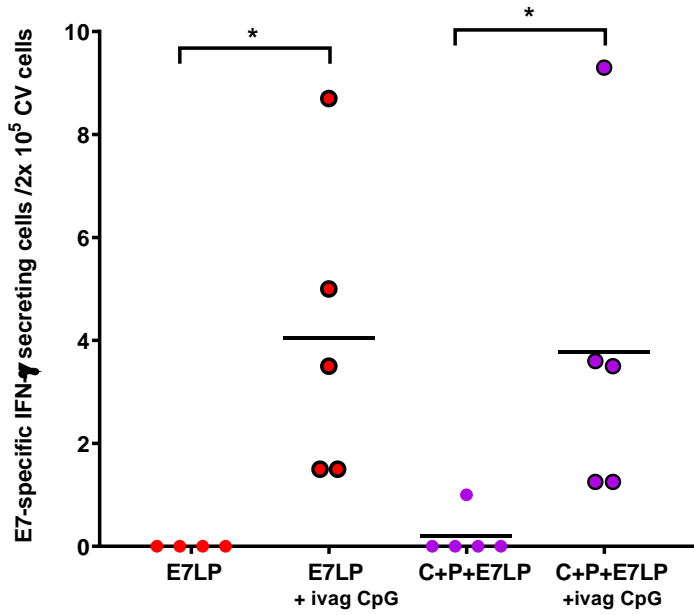

**Additional File 3. Ivag CpG after E7LP or C+P +E7LP vaccination increased E7-specific IFN- $\gamma$  secreting cells in Cervix-Vagina (CV).** Groups of naive mice received the treatments indicated below the graph. C+P chemotherapy was administered 4/5 days before vaccination. 3 doses of ivag CpG were administered 5, 8 and 12 days after vaccination. CV were analyzed by IFN- $\gamma$  ELISPOT 15 days after vaccination. Mean and individual E7-specific IFN- $\gamma$  secreting T cells are shown. \*= $p < 0,05$  by Student t-test.
